# Supplementary material for: Structural and decomposition analysis of TKX-50 with vacancy defects: insights from DFT and AIMD simulations
Source: Royal Society of Chemistry journal article supplement (doi:10.1039/d3cp05209e), 2024-01-01
Supplement: d3cp05209e1.pdf [file d3cp05209e1.pdf]

**Supporting information for:**

## **Structural and Decomposition Analysis of TKX-50 with Vacancy Defects: Insights from DFT and AIMD Simulations**

Zhiwei Guo <sup>a</sup>, Xiaohe Wang <sup>a</sup>, Gazi Hao <sup>a</sup>, Lei Xiao <sup>a</sup>, Xiaojun Feng <sup>c</sup>, Junqing Yang <sup>a,b,\*</sup>, Wei Jiang<sup>a,\*</sup>

<sup>a</sup> *National Special Superfine Powder Engineering Research Center, Nanjing University of Science and Technology, Nanjing 210094, China*

<sup>b</sup> *School of Mechanical Engineering, Nanjing University of Science and Technology, Nanjing 210094, China;*

<sup>c</sup> *Xi'an Modern Chemistry Research Institute, Xi'an 710065, China*

*\*Corresponding authors:* Junqing Yang, [yjq881223@163.com](mailto:yjq881223@163.com)

Wei Jiang, [climentjw@126.com](mailto:climentjw@126.com)

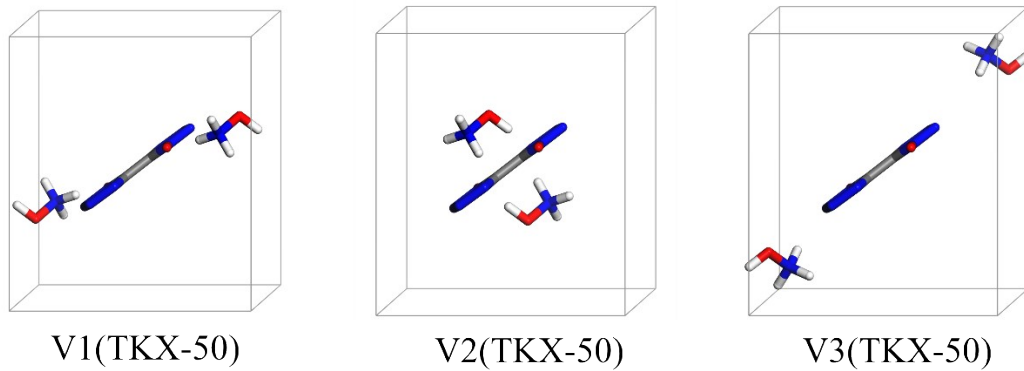

**Fig.S1** The isolated TKX-50 models in V1-V3 system

As shown in Figure S1, the TKX-50 in the model are the anions and cations deleted when creating the defective system.

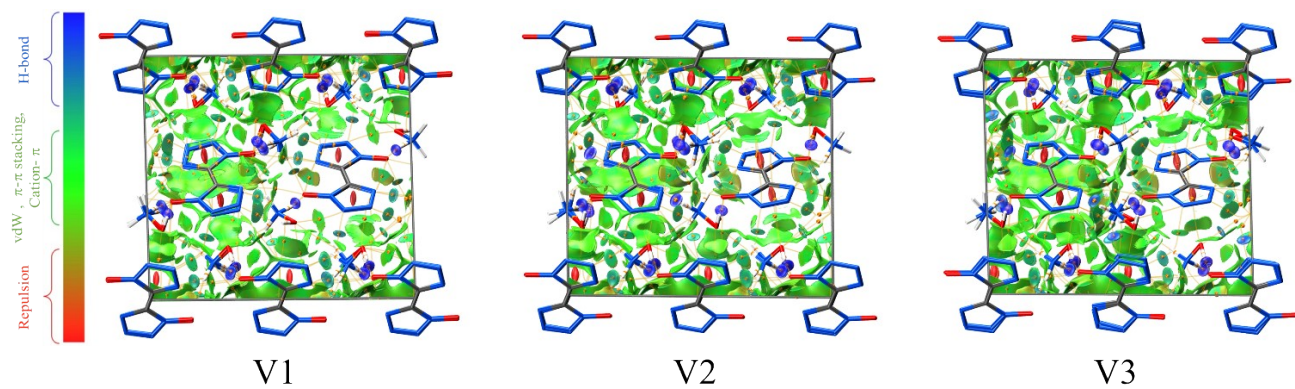

**Fig.S2** Colored isosurfaces of the noncovalent interactions of V1-V3 by NCI analysis

**Table S1** The potential energy density  $V(r)$ , hydrogen bond energy  $E_{\text{HB}}$  (kcal mol<sup>-1</sup>), the electron density  $\rho(r)$ , Laplacian value  $\nabla^2\rho(r)$  and the energy density  $H(r)$  at the bond critical points (BCPs) for the noncovalent interactions of V0-V3

|             |     | Connected atoms | Interaction type | $\rho(r)$ [a.u.] | $V(r)$ [a.u.] | $E_{\text{HB}}$ [kcal mol <sup>-1</sup> ] | $H(r)$ [a.u.] | $\nabla^2\rho(r)$ [a.u.] |       |
|-------------|-----|-----------------|------------------|------------------|---------------|-------------------------------------------|---------------|--------------------------|-------|
| (a) and (e) | 1   | O2---H5C        | H-bond           | 0.012            | -0.0078       | -2.46                                     | 0.003         | 0.051                    |       |
|             | 2   | O2---N4         | Cation- $\pi$    | 0.005            | -0.0025       | \                                         | 0.001         | 0.020                    |       |
|             | 3   | H5C---N2        | H-bond           | 0.013            | -0.0082       | -2.57                                     | 0.002         | 0.051                    |       |
|             | 4   | H5C---O2        | H-bond           | 0.012            | -0.0078       | -2.45                                     | 0.003         | 0.051                    |       |
|             | 5   | H5C---N3        | H-bond           | 0.013            | -0.0083       | -2.60                                     | 0.002         | 0.051                    |       |
|             | 6   | H5A---N4        | H-bond           | 0.020            | -0.0132       | -4.13                                     | 0.001         | 0.063                    |       |
|             | 7   | H5A---O1        | H-bond           | 0.014            | -0.0091       | -2.87                                     | 0.002         | 0.055                    |       |
|             | 8   | N5---N4         | vdW              | 0.005            | -0.0029       | \                                         | 0.001         | 0.022                    |       |
|             | 9   | H5B---O1        | H-bond           | 0.045            | -0.0383       | -12.03                                    | -0.005        | 0.113                    |       |
|             | 10  | H2---O1         | H-bond           | 0.063            | -0.0602       | -18.90                                    | -0.015        | 0.122                    |       |
| (b)         | 1   | O2---H5C        | H-bond           | 0.010            | -0.0057       | -1.79                                     | 0.002         | 0.042                    |       |
|             | 2   | O2---C1         | Cation- $\pi$    | 0.005            | -0.0027       | \                                         | 0.001         | 0.022                    |       |
|             | 3   | N5---N2         | vdW              | 0.008            | -0.0052       | \                                         | 0.002         | 0.036                    |       |
|             | 4   | H5C---O2        | H-bond           | 0.012            | -0.0074       | -2.33                                     | 0.002         | 0.050                    |       |
|             | 5   | H5C---N3        | H-bond           | 0.016            | -0.0103       | -3.22                                     | 0.002         | 0.057                    |       |
|             | 8   | H5A---N4        | H-bond           | 0.009            | -0.0046       | -1.44                                     | 0.002         | 0.032                    |       |
|             | 9   | H5B---O1        | H-bond           | 0.066            | -0.0635       | -19.91                                    | -0.017        | 0.121                    |       |
|             | 10  | H2---O1         | H-bond           | 0.070            | -0.0698       | -21.90                                    | -0.020        | 0.121                    |       |
|             | (c) | 1               | O2---H5C         | H-bond           | 0.013         | -0.0086                                   | -2.70         | 0.002                    | 0.054 |
|             |     | 2               | O2---C1          | Cation- $\pi$    | 0.006         | -0.0030                                   | \             | 0.001                    | 0.024 |
| 3           |     | N5---N2         | vdW              | 0.007            | -0.0043       | \                                         | 0.002         | 0.031                    |       |
| 4           |     | H5C---O2        | H-bond           | 0.010            | -0.0056       | -1.76                                     | 0.002         | 0.041                    |       |
| 5           |     | H5C---N3        | H-bond           | 0.014            | -0.0082       | -2.58                                     | 0.002         | 0.049                    |       |
| 8           |     | H5A---N4        | H-bond           | 0.028            | -0.0188       | -5.91                                     | 0.000         | 0.076                    |       |
| 9           |     | H5B---O1        | H-bond           | 0.045            | -0.0385       | -12.08                                    | -0.005        | 0.114                    |       |
| 10          |     | H2---O1         | H-bond           | 0.084            | -0.0907       | -28.45                                    | -0.031        | 0.113                    |       |
| (d)         |     | 1               | O2---H5C         | H-bond           | 0.011         | -0.0067                                   | -2.11         | 0.002                    | 0.047 |
|             |     | 2               | O2---N4          | Cation- $\pi$    | 0.007         | -0.0039                                   | \             | 0.002                    | 0.029 |
|             | 3   | N5---N2         | vdW              | 0.012            | -0.0081       | \                                         | 0.002         | 0.052                    |       |
|             | 4   | H5C---O2        | H-bond           | 0.022            | -0.0158       | -4.96                                     | 0.002         | 0.076                    |       |
|             | 5   | N5---N3         | vdW              | 0.012            | -0.0074       | \                                         | 0.002         | 0.048                    |       |
|             | 8   | H5A---N4        | H-bond           | 0.008            | -0.0045       | -1.43                                     | 0.002         | 0.032                    |       |
|             | 9   | H5B---O1        | H-bond           | 0.040            | -0.0334       | -10.48                                    | -0.004        | 0.105                    |       |
|             | 10  | H2---O1         | H-bond           | 0.070            | -0.0703       | -22.07                                    | -0.020        | 0.121                    |       |
|             | (f) | 1               | O2---H5C         | H-bond           | 0.006         | -0.003                                    | -0.99         | 0.002                    | 0.027 |

---

|     |    |          |               |       |         |        |        |       |
|-----|----|----------|---------------|-------|---------|--------|--------|-------|
|     | 2  | O2---N4  | Cation- $\pi$ | 0.004 | -0.002  | \      | 0.001  | 0.017 |
|     | 3  | H5C---N2 | H-bond        | 0.016 | -0.010  | -3.21  | 0.002  | 0.057 |
|     | 4  | H5C---O2 | H-bond        | 0.012 | -0.008  | -2.49  | 0.002  | 0.052 |
|     | 5  | N5---N3  | vdW           | 0.015 | -0.010  | \      | 0.003  | 0.059 |
|     | 6  | H5A---N4 | H-bond        | 0.017 | -0.011  | -3.43  | 0.002  | 0.057 |
|     | 7  | H5A---O1 | H-bond        | 0.014 | -0.009  | -2.79  | 0.002  | 0.053 |
|     | 9  | H5B---O1 | H-bond        | 0.075 | -0.076  | -23.73 | -0.024 | 0.111 |
|     | 11 | O2---N2  | vdW           | 0.004 | -0.002  | \      | 0.001  | 0.018 |
|     | 12 | H2---N2  | H-bond        | 0.005 | -0.002  | -0.77  | 0.001  | 0.020 |
| (g) | 1  | O2---H5C | H-bond        | 0.016 | -0.0106 | -3.31  | 0.002  | 0.061 |
|     | 2  | O2---N4  | Cation- $\pi$ | 0.006 | -0.0034 | \      | 0.002  | 0.026 |
|     | 3  | H5C---N2 | H-bond        | 0.017 | -0.0108 | -3.39  | 0.002  | 0.057 |
|     | 4  | N5---O2  | vdW           | 0.008 | -0.0047 | \      | 0.002  | 0.036 |
|     | 5  | H5C---N3 | H-bond        | 0.013 | -0.0077 | -2.41  | 0.002  | 0.047 |
|     | 6  | H5A---N4 | H-bond        | 0.047 | -0.0359 | -11.25 | -0.006 | 0.097 |
|     | 7  | N5---O1  | vdW           | 0.010 | -0.0063 | \      | 0.002  | 0.045 |
|     | 8  | N5---N4  | H-bond        | 0.020 | -0.0130 | -4.08  | 0.001  | 0.063 |
|     | 10 | H2---O1  | H-bond        | 0.083 | -0.0891 | -27.97 | -0.031 | 0.108 |
| (h) | 1  | O2---H5C | H-bond        | 0.004 | -0.0021 | -0.67  | 0.001  | 0.020 |
|     | 3  | H5C---N2 | H-bond        | 0.023 | -0.0163 | -5.11  | 0.001  | 0.077 |
|     | 4  | H5C---O2 | H-bond        | 0.013 | -0.0088 | -2.76  | 0.003  | 0.055 |
|     | 5  | N5---N3  | vdW           | 0.013 | -0.0083 | \      | 0.002  | 0.053 |
|     | 6  | H5A---N4 | H-bond        | 0.013 | -0.0078 | -2.45  | 0.002  | 0.047 |
|     | 7  | H5A---O1 | H-bond        | 0.028 | -0.0211 | -6.63  | 0.000  | 0.086 |
|     | 9  | H5B---O1 | H-bond        | 0.051 | -0.0463 | -14.53 | -0.008 | 0.122 |
|     | 11 | O2---N2  | vdW           | 0.003 | -0.0015 | \      | 0.001  | 0.014 |
|     | 12 | H2---N2  | H-bond        | 0.007 | -0.0036 | -1.12  | 0.002  | 0.027 |
|     | 13 | H2---N4  | H-bond        | 0.009 | -0.0049 | -1.54  | 0.002  | 0.034 |

---

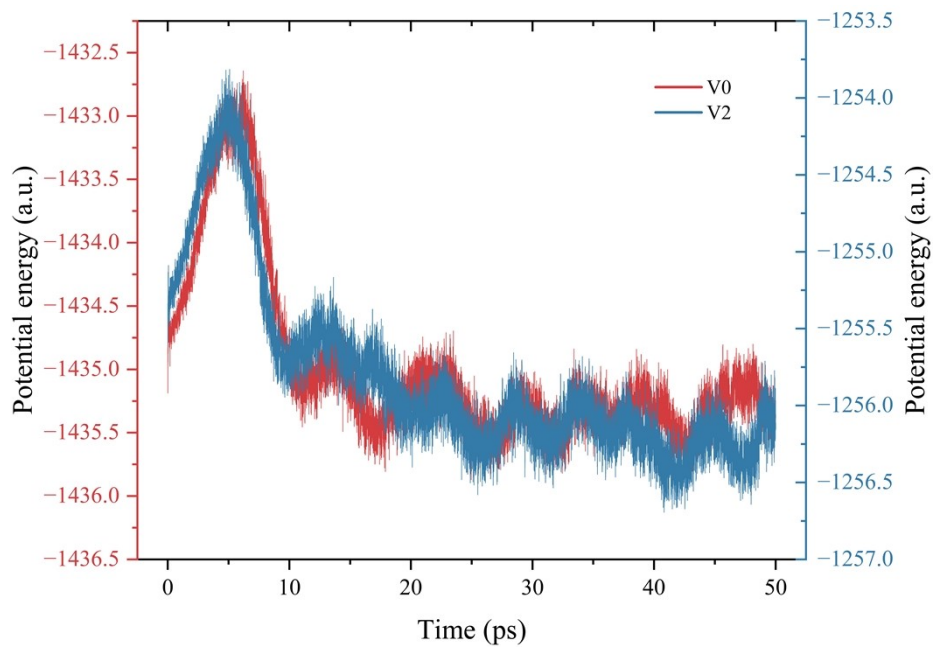

**Fig.S3** Potential energy evolution curves of V0 and V2 systems

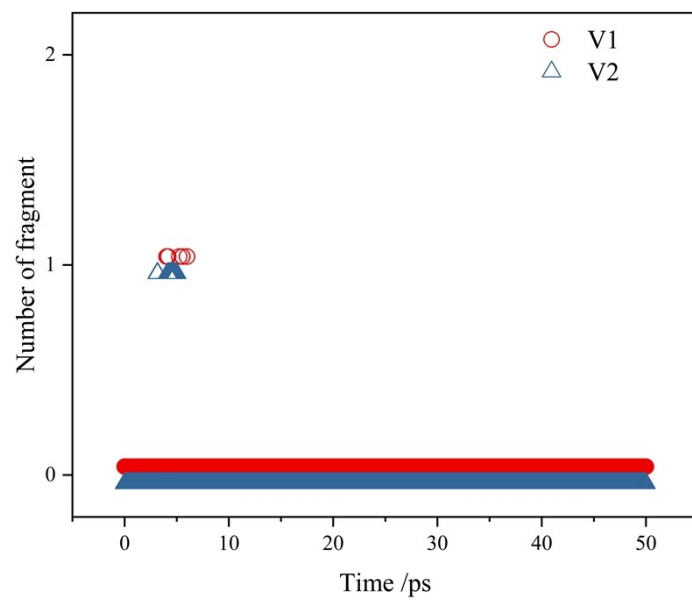

**Fig.S4** The evolution of ABTOX
